# Supplementary material for: Efficiency of energy transfer decreases with the number of graphene layers
Source: Royal Society of Chemistry journal article supplement (doi:10.1039/c6ra20266g), 2016-01-01
Supplement: c6ra20266g1.pdf [file c6ra20266g1.pdf]

Supporting Information

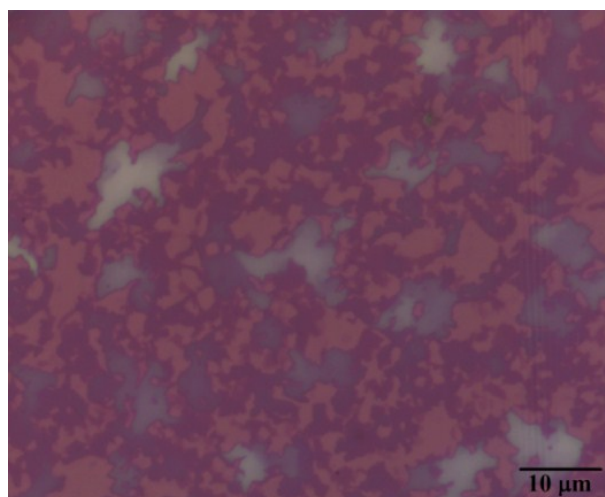

Figure S1. Reflectance image of the MLG substrate.

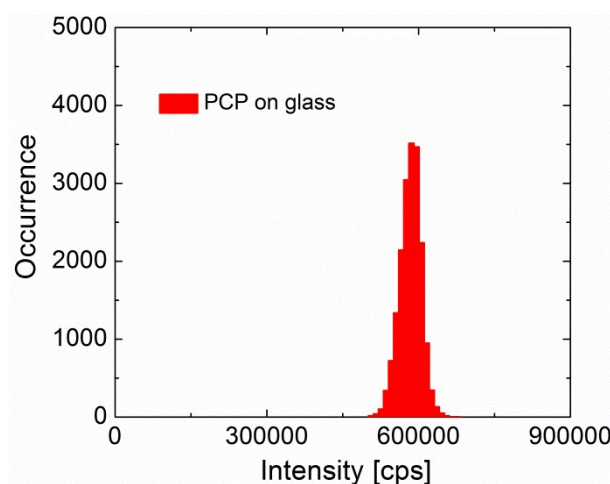

Figure S2. Histogram of fluorescence intensity obtained for PCP on glass.

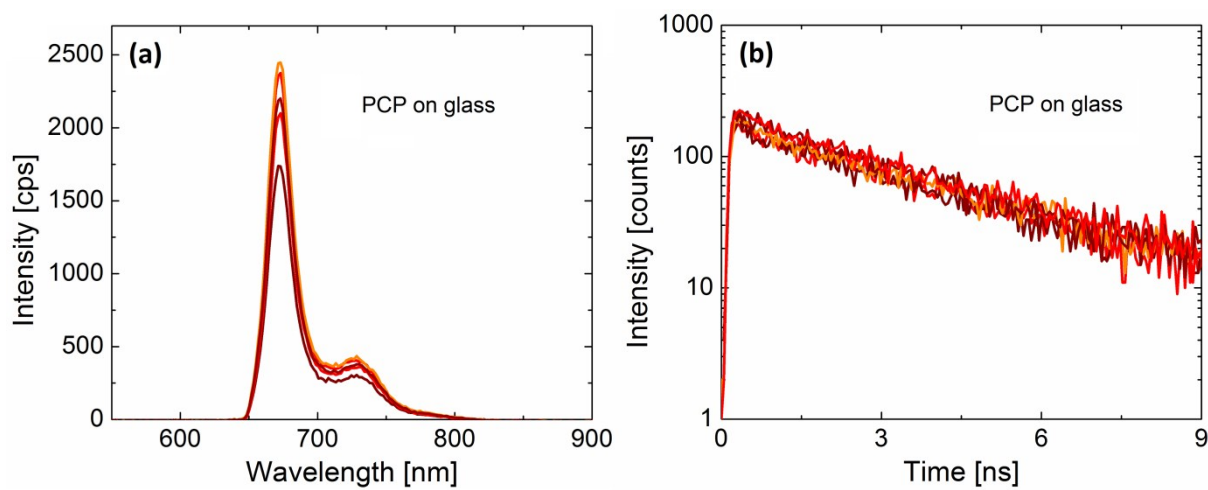

Figure S3. Collections of (a) fluorescence spectra and (b) fluorescence intensity decays of PCP complexes spin coated on a glass. The excitation wavelength of 485 nm was used.
